# Supplementary material for: Intense UV upconversion through highly sensitized NaRF4:Tm (R:Y,Yb) crystals
Source: Royal Society of Chemistry journal article supplement (doi:10.1039/c5ra01613d), 2015-01-01
Supplement: c5ra01613d1.pdf [file c5ra01613d1.pdf]

*Supporting information for*

## **Intense UV upconversion through highly sensitized NaRF<sub>4</sub>Tm (R:Y,Yb) crystals**

Vishal Kale<sup>\*a</sup>, Mika Lastusaari<sup>b,c</sup>, Jorma Hölsä<sup>b,c,d</sup> and Tero Soukka<sup>a</sup>

<sup>a</sup> Department of Biotechnology, University of Turku, Tykistökatu 6 A, FI-20520 Turku, Finland.

<sup>b</sup> Department of Chemistry, University of Turku, FI-20014 Turku, Finland.

<sup>c</sup> Turku Centre for Materials and Surfaces (MatSurf), Turku, Finland.

<sup>d</sup> Instituto de Química, Universidade de São Paulo, São Paulo-SP, Brazil.

Corresponding Author

\*Email: [vishal.kale@utu.fi](mailto:vishal.kale@utu.fi)

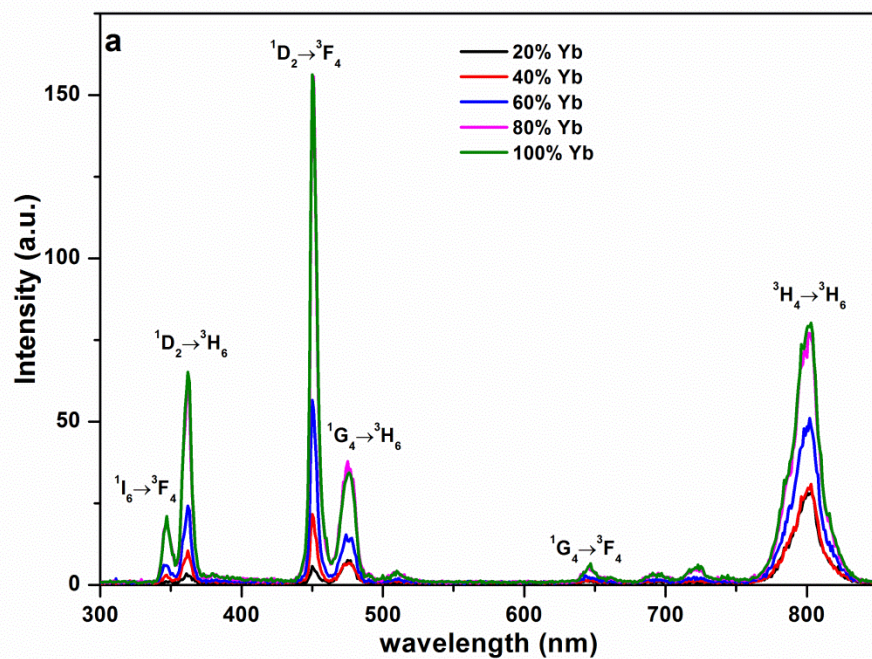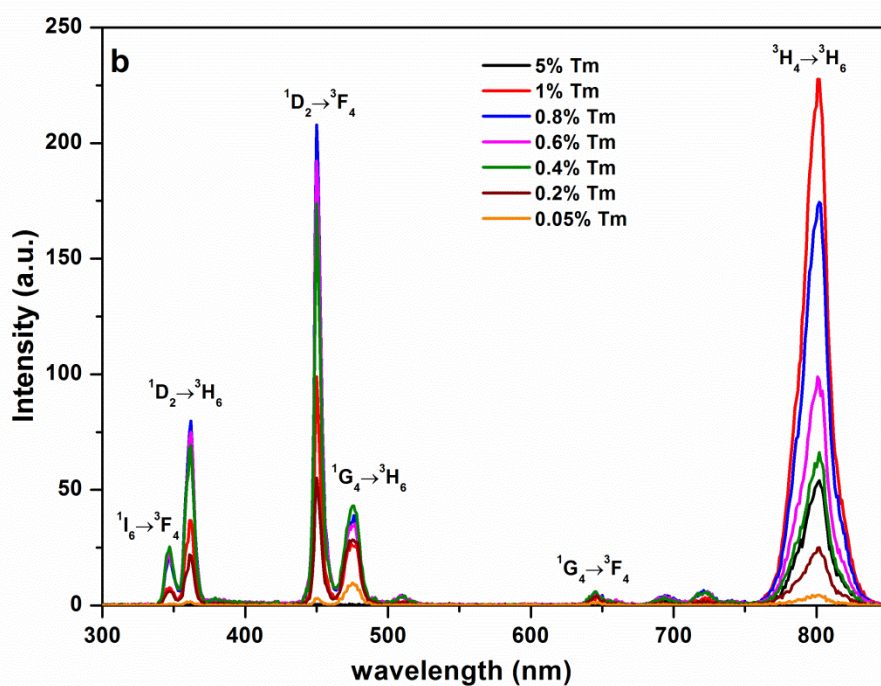

**Fig. S1** Upconversion luminescence spectra of a) NaY<sub>1-x</sub>Yb<sub>x</sub>F<sub>4</sub>:Tm (0.5%) and b) NaYbF<sub>4</sub>:Tm (x%) nanocrystal dispersion in oleic acid pumped by a 980 nm laser.

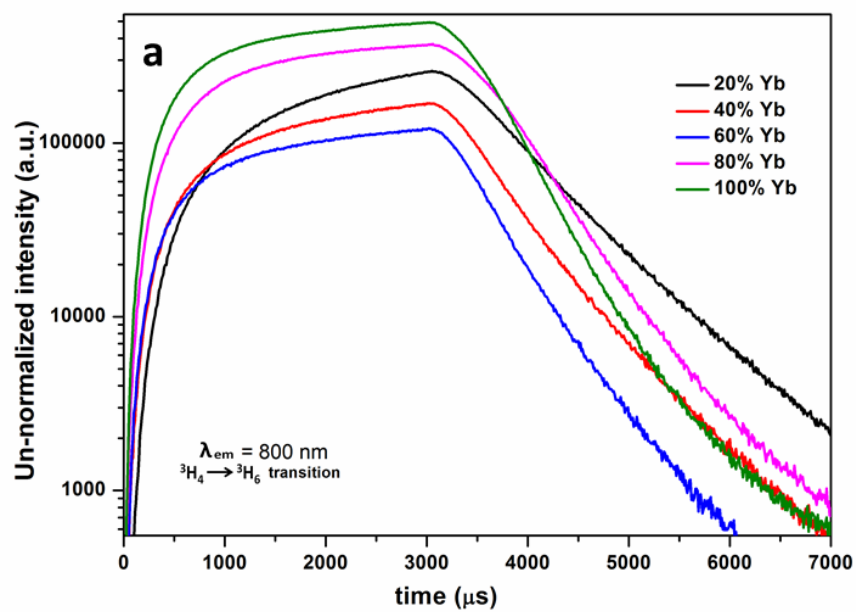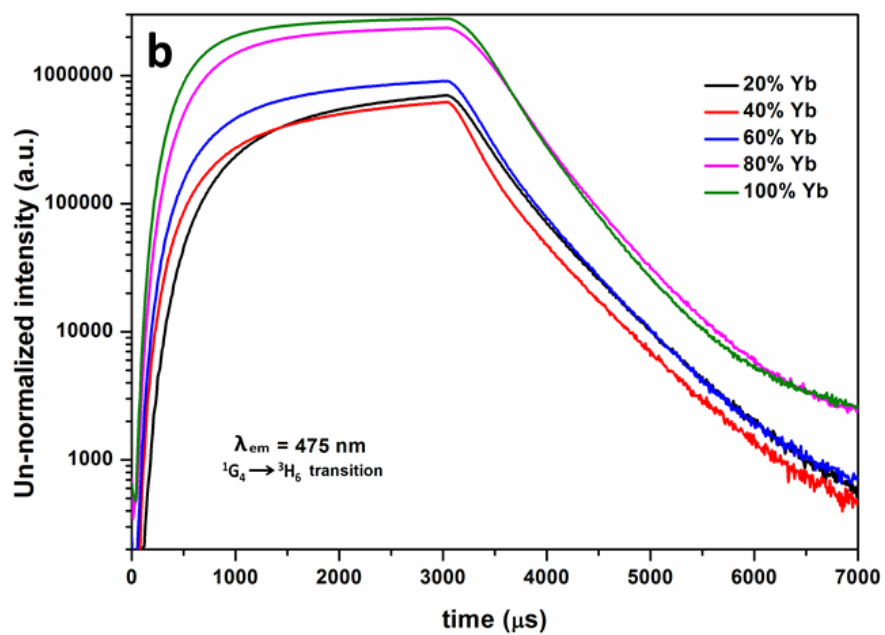

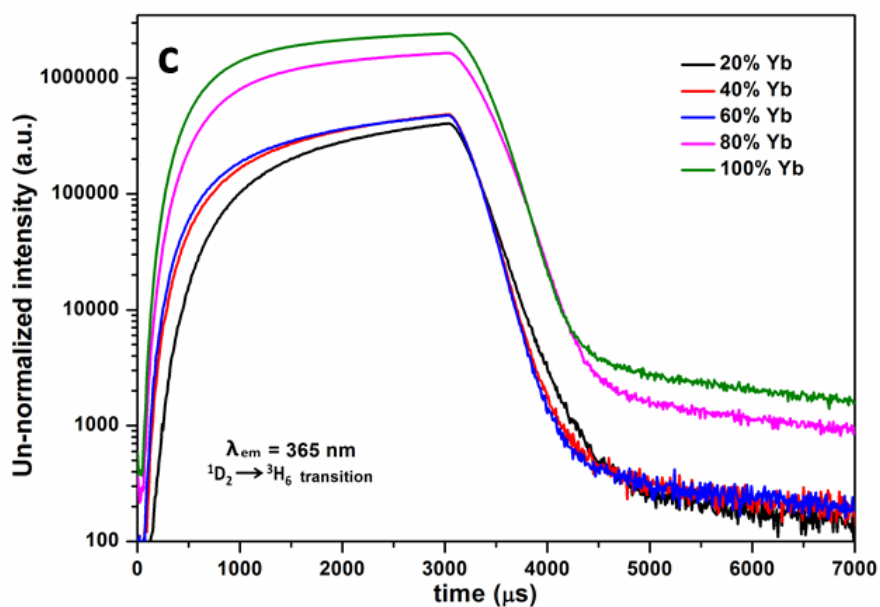

**Fig. S2** Non-normalized spectra of upconversion luminescence decay of the  $\text{NaY}_{1-x}\text{Yb}_x\text{F}_4:\text{Tm}$  (0.5%) nanocrystal dispersion in oleic acid for the a) 800 nm, b) 475 nm and c) 365 nm emissions upon 980 nm excitation for 0-3000  $\mu\text{s}$ .

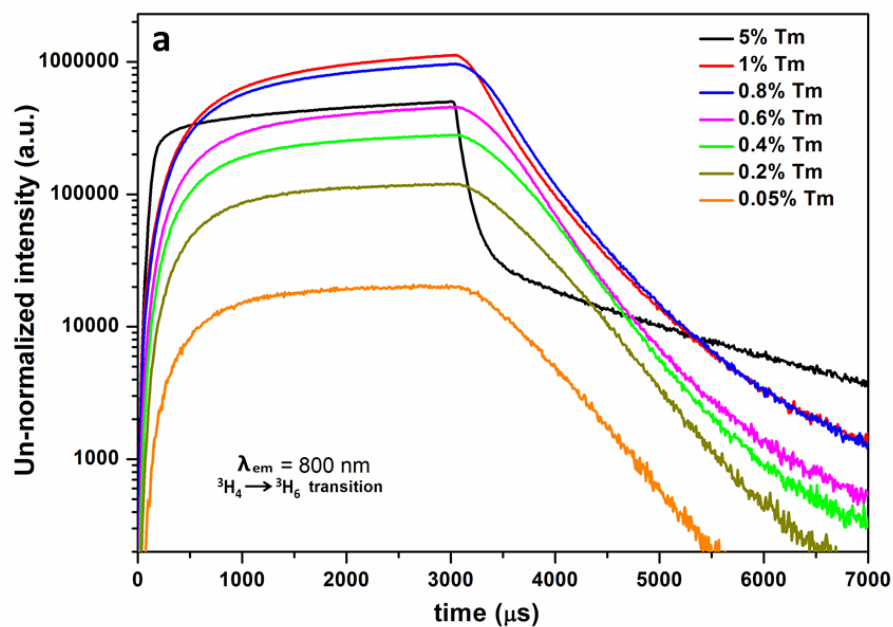

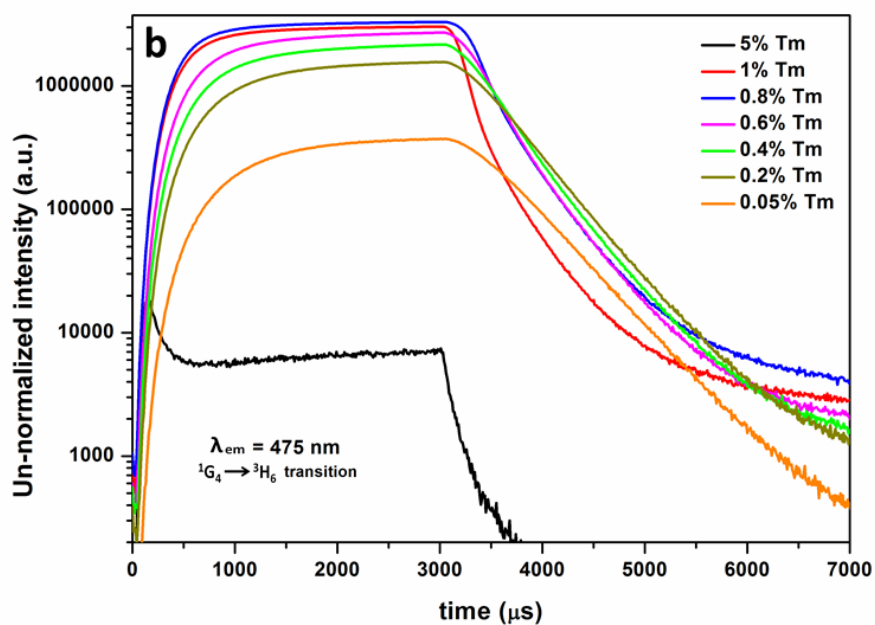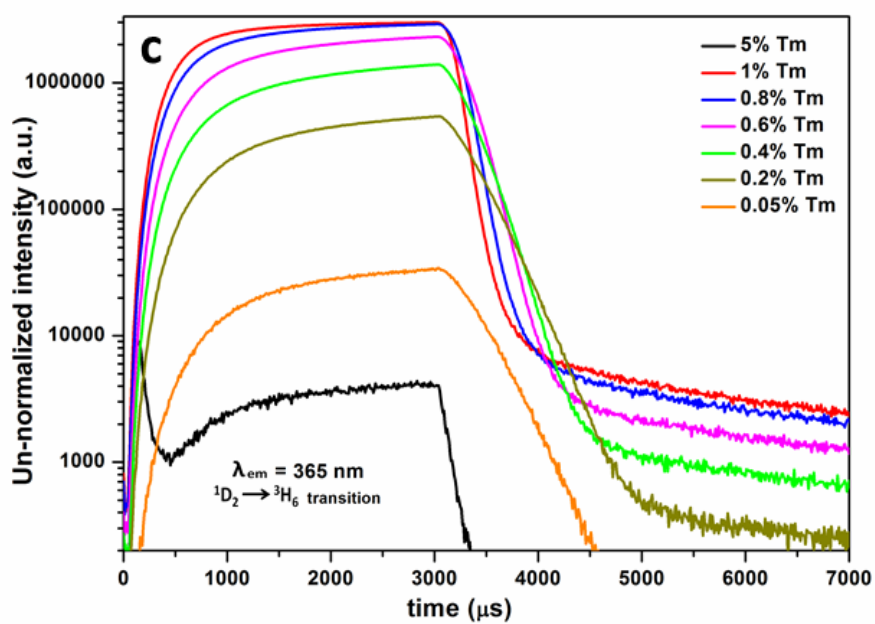

**Fig. S3** Non-normalized spectra of upconversion luminescence decay of the  $\text{NaYbF}_4:\text{Tm}$  (x%) nanocrystal dispersion in oleic acid for the a) 800 nm, b) 475 nm and c) 365 nm emissions upon 980 nm excitation for 0-3000  $\mu\text{s}$ .

**Table S1.** Summary of decay times of  $^3\text{H}_4$ ,  $^1\text{G}_4$  and  $^1\text{D}_2$  level of  $\text{NaY}_{1-x}\text{Yb}_x\text{F}_4:\text{TM}$  (0.5%) and  $\text{NaYbF}_4:\text{TM}$  (x%) with respective relative amplitude.

| <b>Yb<sup>3+</sup></b><br><b>(mol %)<sup>#</sup></b> | <b><math>^3\text{H}_4 \rightarrow ^3\text{H}_6</math> (800 nm)</b> |                      | <b><math>^1\text{G}_4 \rightarrow ^3\text{H}_6</math> (475 nm)</b> |                      | <b><math>^1\text{D}_2 \rightarrow ^3\text{H}_6</math> (365 nm)</b> |                      |
|------------------------------------------------------|--------------------------------------------------------------------|----------------------|--------------------------------------------------------------------|----------------------|--------------------------------------------------------------------|----------------------|
|                                                      | <b><math>\tau(\mu\text{s})</math></b>                              | <b>amplitude (%)</b> | <b><math>\tau(\mu\text{s})</math></b>                              | <b>amplitude (%)</b> | <b><math>\tau(\mu\text{s})</math></b>                              | <b>amplitude (%)</b> |
| 20                                                   | 630 ± 8                                                            | 81                   | 576 ± 2                                                            | 56                   | 168 ± 0.3                                                          | 100                  |
| 40                                                   | 422 ± 5                                                            | 80                   | 547 ± 2                                                            | 50                   | 142 ± 0.3                                                          | 100                  |
| 60                                                   | 378 ± 7                                                            | 78                   | 224 ± 2                                                            | 56                   | 138 ± 0.3                                                          | 100                  |
| 80                                                   | 440 ± 5                                                            | 88                   | 362 ± 2                                                            | 92                   | 157 ± 0.4                                                          | 100                  |
| 100                                                  | 375 ± 1                                                            | 97                   | 293 ± 4                                                            | 77                   | 137 ± 0.3                                                          | 100                  |
| <b>Tm<sup>3+</sup></b><br><b>(mol %)<sup>#</sup></b> | <b><math>^3\text{H}_4 \rightarrow ^3\text{H}_6</math> (800 nm)</b> |                      | <b><math>^1\text{G}_4 \rightarrow ^3\text{H}_6</math> (475 nm)</b> |                      | <b><math>^1\text{D}_2 \rightarrow ^3\text{H}_6</math> (365 nm)</b> |                      |
|                                                      | <b><math>\tau(\mu\text{s})</math></b>                              | <b>amplitude (%)</b> | <b><math>\tau(\mu\text{s})</math></b>                              | <b>amplitude (%)</b> | <b><math>\tau(\mu\text{s})</math></b>                              | <b>amplitude (%)</b> |
| 0.05                                                 | 481 ± 4                                                            | 100                  | 510 ± 5                                                            | 100                  | 272 ± 1                                                            | 100                  |
| 0.2                                                  | 470 ± 5                                                            | 100                  | 427 ± 0.5                                                          | 100                  | 235 ± 2                                                            | 100                  |
| 0.4                                                  | 430 ± 7                                                            | 100                  | 358 ± 1                                                            | 98                   | 169 ± 0.5                                                          | 100                  |
| 0.6                                                  | 321 ± 5                                                            | 99                   | 256 ± 3                                                            | 98                   | 125 ± 76                                                           | 99                   |
| 0.8                                                  | 337 ± 2                                                            | 94                   | 169 ± 2                                                            | 85                   | 98 ± 0.2                                                           | 99                   |
| 1                                                    | 275 ± 2                                                            | 87                   | 88 ± 0.5                                                           | 93                   | 82 ± 0.3                                                           | 99                   |
| 5                                                    | 70 ± 0.5                                                           | 91                   | 82 ± 3                                                             | 85                   | 80 ± 10                                                            | 72                   |

Note: Only the major lifetime component (with the highest amplitude) in case of multiexponential decay. Samples with 100% amplitude had a single decay time. <sup>#</sup> the percentages are with respect to the added quantity in the synthesis.



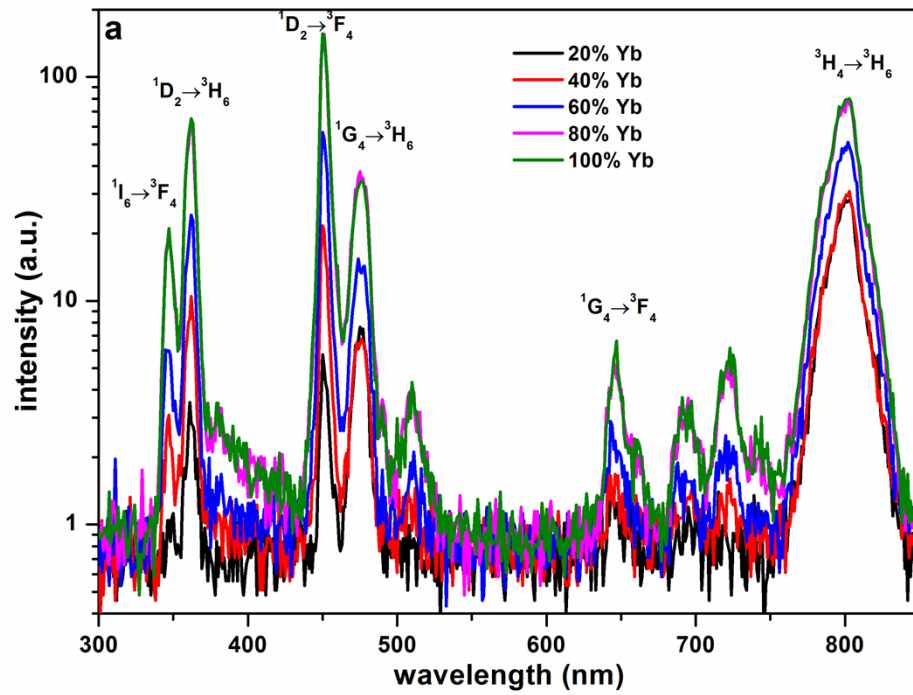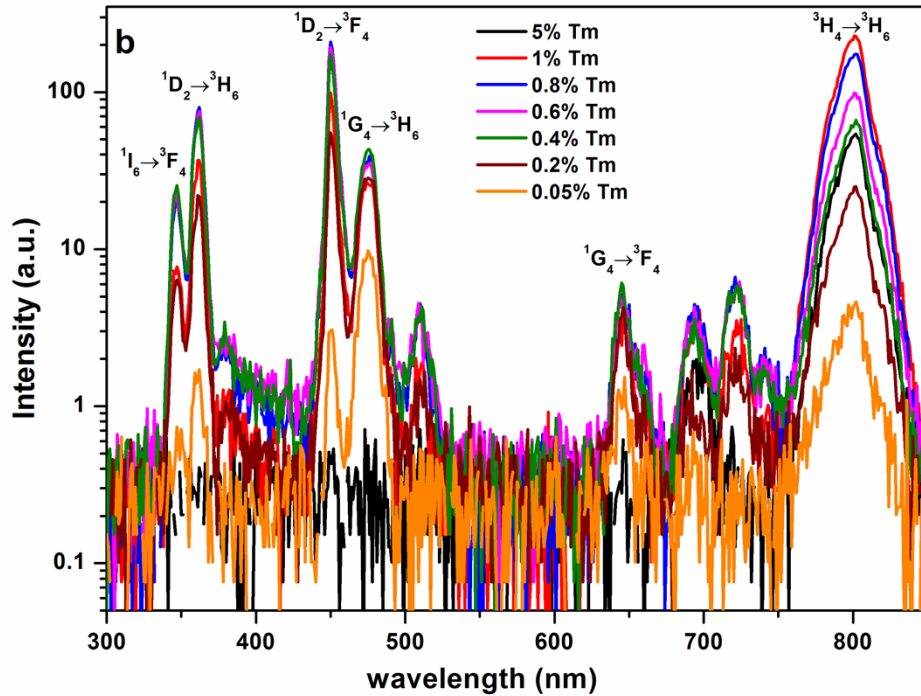

**Fig. S4** Upconversion luminescence spectra of a)  $\text{NaY}_{1-x}\text{Yb}_x\text{F}_4:\text{Tm}$  (0.5%) and b)  $\text{NaYbF}_4:\text{Tm}$  (x%) nanocrystal dispersion in oleic acid pumped by a 980 nm laser.

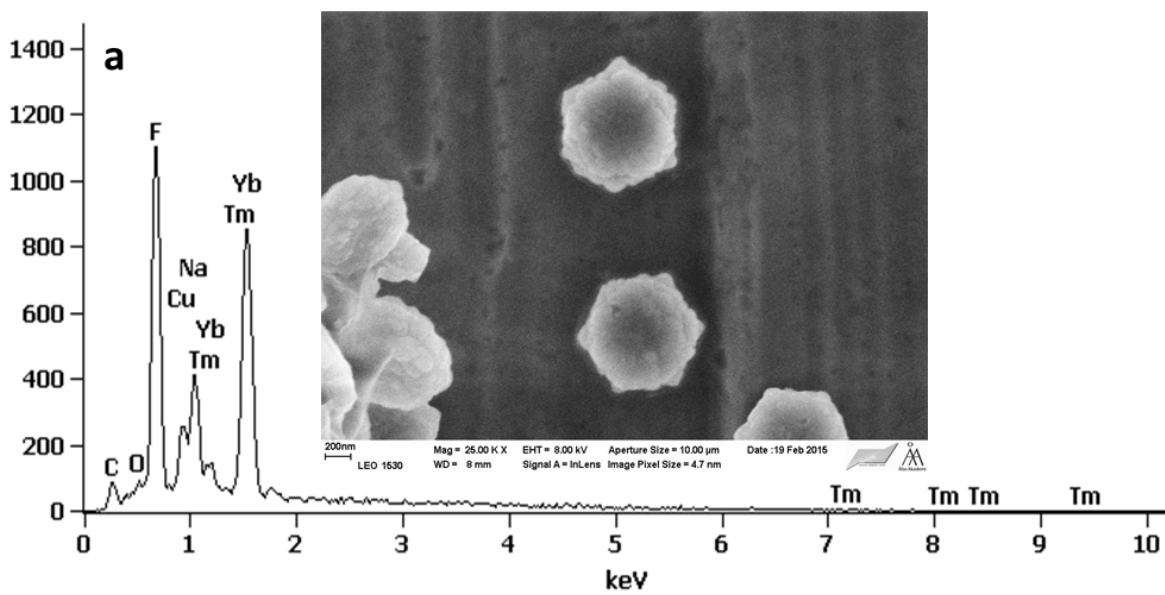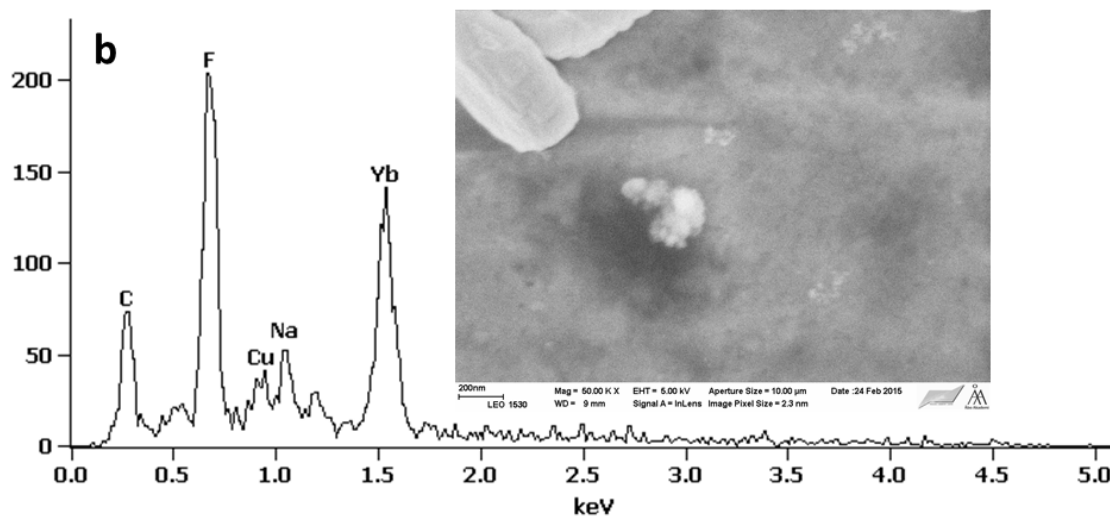

**Fig. S5** EDX analysis of a) large and b) small  $\text{NaYbF}_4:\text{Tm}$  (0.8%) nanoparticles with corresponding SEM images.



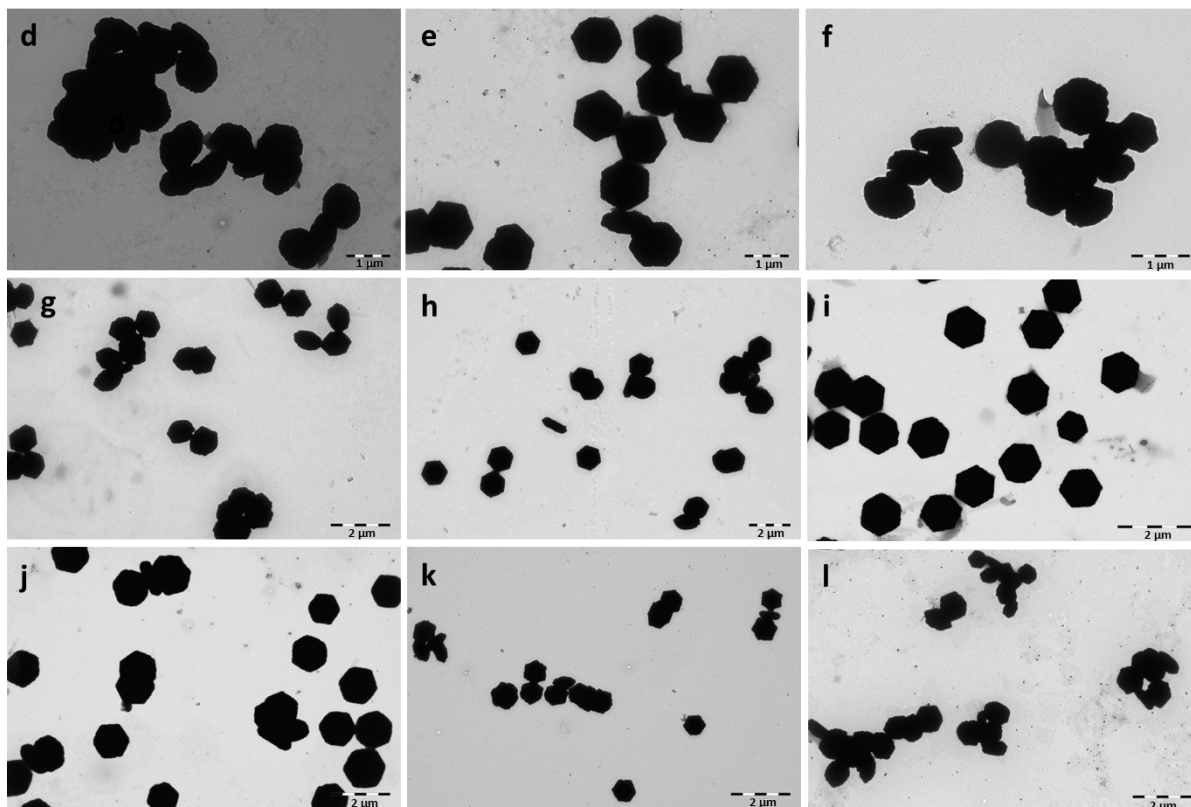

**Fig. S6** TEM images of hexagonal  $\text{NaY}_{1-x}\text{Yb}_x\text{F}_4:\text{Tm}$  (0.5%) with different concentrations of  $\text{Yb}^{3+}$ : d) 80 and e) 100% and  $\text{NaYbF}_4:\text{Tm}$  (x%) crystals with different concentrations of  $\text{Tm}^{3+}$ : f) 0.05, g) 0.2, h) 0.4, i) 0.6, j) 0.8, k) 1 and l) 5%.
